# Supplementary material for: Exploring the Diverse Morphology of Porous Poly(Lactic Acid) Fibers for Developing Long-Term Controlled Antibiotic Delivery Systems
Source: MDPI journal article supplement (doi:10.3390/pharmaceutics14061272), 2022-06-15
Supplement: s1 [file s1]

## Supporting information

### Exploring the diverse morphology of porous poly(lactic acid) fibers for developing long-term controlled antibiotic delivery systems

Juran Kim<sup>1\*</sup> and Kwon Ho Seo<sup>1</sup>, Kyung Eun Lee<sup>2</sup> and Meltem Yanilmaz<sup>3\*</sup>

<sup>1</sup>Advanced Textile R&D Department, Korea Institute of Industrial Technology (KITECH), Ansan 15588, Korea; [tjrnjsgh@kitech.re.kr](mailto:tjrnjsgh@kitech.re.kr) (K.H.S.)

<sup>2</sup>Department of Mechanical Engineering, Inha University, 100 Inharo, Incheon, 22212, Republic of Korea; [bfmec@inha.ac.kr](mailto:bfmec@inha.ac.kr) (K.E.L.)

<sup>3</sup>Textile Engineering, Istanbul Technical University, 34467 Istanbul, Turkey; [yanilmaz@itu.edu.tr](mailto:yanilmaz@itu.edu.tr) (M.Y.)

\*Correspondence: [jkim0106@kitech.re.kr](mailto:jkim0106@kitech.re.kr) (J. K.)

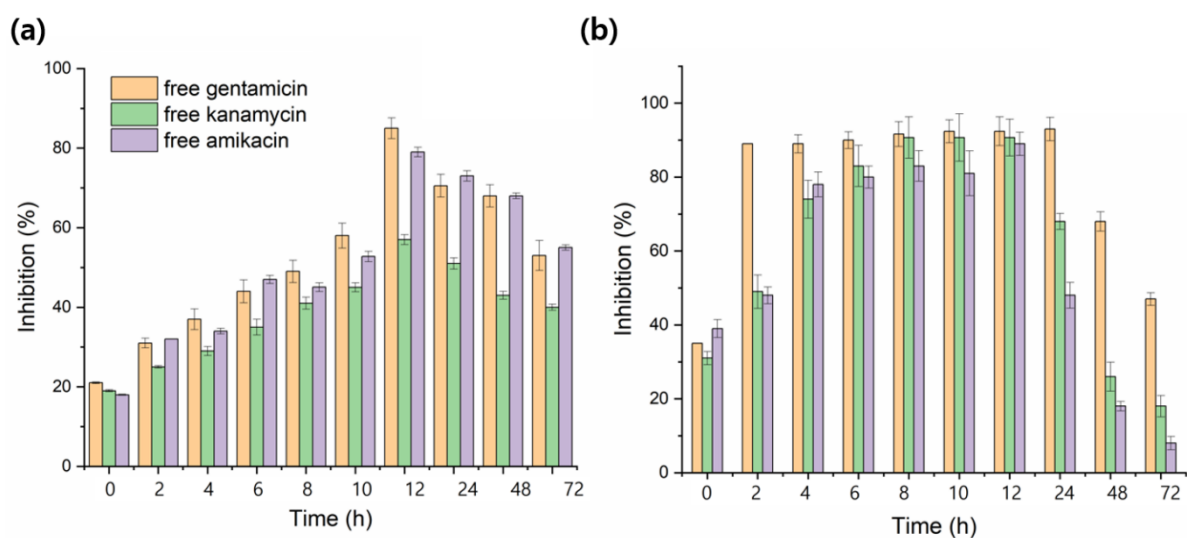

Figure S1. Antibacterial activities of free gentamicin, kanamycin, and amikacin for 72 h.

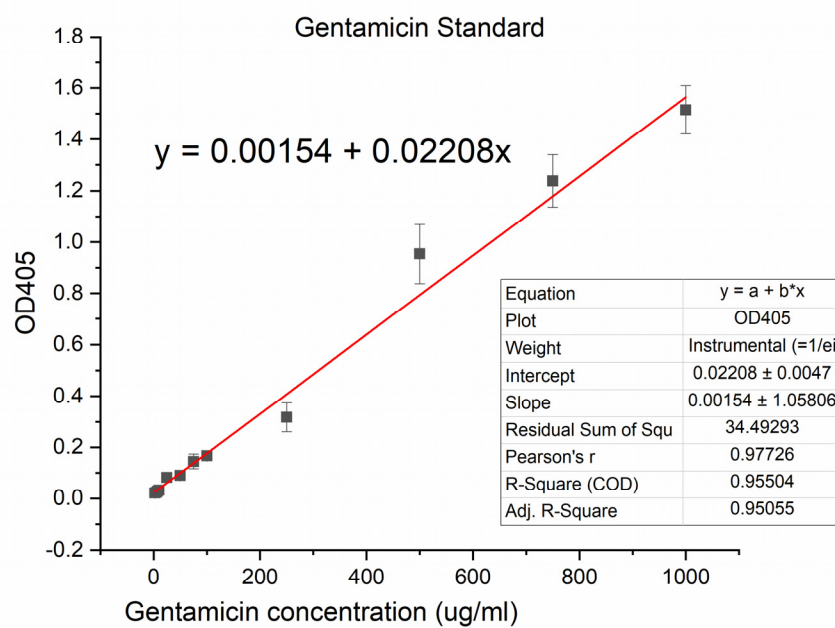

Figure S2. Gentamicin concentration-OD<sub>405</sub> standard curve.
